# Supplementary material for: Characteristic gene alterations in primary gastrointestinal T- and NK-cell lymphomas
Source: PubMed Central journal article supplement (PMC6755973; doi:10.1038/s41375-018-0309-4), 2019-01-23
Supplement: 41375_2018_309_MOESM16_ESM.pdf [file 41375_2018_309_MOESM16_ESM.pdf]

**Supplementary Table 2. Clinical and pathological features of the patients**

|                      | Targeted sequencing (n=46) <sup>a</sup> | Immunohistochemistry (n=131) <sup>b</sup> |
|----------------------|-----------------------------------------|-------------------------------------------|
|                      | n (%)                                   | n (%)                                     |
| Sex                  |                                         |                                           |
| Male                 | 34 (73.9%)                              | 84 (64.1%)                                |
| Female               | 12 (26.1%)                              | 47 (35.9%)                                |
| Age                  |                                         |                                           |
| mean ± s.d. (years)  | 59.0 ± 13.1                             | 56.4 ± 17.9                               |
| Location             |                                         |                                           |
| GI                   | 18 (39.1%)                              | 13 (9.9%)                                 |
| LN                   | 19 (41.3%)                              | 78 (59.5%)                                |
| Nasal                | 9 (19.6%)                               | 31 (23.7%)                                |
| Others               |                                         | 9 (6.9%)                                  |
| Subtype <sup>c</sup> |                                         |                                           |
| AITL                 |                                         | 19 (14.5%)                                |
| ALCL, ALK-           | 9 (19.6%)                               | 14 (10.7%)                                |
| ALCL, ALK+           | 0                                       | 8 (6.1%)                                  |
| MEITL                | 6 (13.0%)                               | 6 (4.6%)                                  |
| ENKTL                | 15 (32.6%)                              | 35 (26.7%)                                |
| ITCL-NOS             | 3 (6.5%)                                | 2 (1.5%)                                  |
| PTCL-NOS             | 16 (28.3%)                              | 47 (35.9%)                                |
| Ann Arbor stage      |                                         |                                           |
| I-II                 | 14 (30.4%)                              | 33 (25.2%)                                |
| III-IV               | 22 (47.8%)                              | 67 (51.1%)                                |
| Unknown              | 10 (21.7%)                              | 31 (23.7%)                                |
| EBV <sup>d</sup>     |                                         |                                           |
| Negative             | 17 (37.0%)                              | 37 (28.2%)                                |
| Positive             | 21 (45.7%)                              | 41 (31.3%)                                |
| Unknown              | 8 (17.4%)                               | 53 (40.4%)                                |
| Clinical outcome     |                                         |                                           |
| Alive                | 15 (32.6%)                              | 47 (35.9%)                                |
| Dead                 | 31 (67.4%)                              | 84 (64.1%)                                |

a. Tissue samples from these patients were used in target sequencing and RT-PCR. Cases undergoing whole exome sequencing (n=6) were included.

b. Tissue samples from these patients were used in immunohistochemical analysis. Most cases undergoing target sequencing were included in IHC, although five cases of GI-TNKL were lost due to lack of tissue.

c. AITL, angioimmunoblastic T cell lymphoma; ALCL, anaplastic large cell lymphoma; ALK-, ALK-negative; ALK+, ALK-positive; MEITL, monomorphic epitheliotropic intestinal T cell lymphoma; ENKTL, extranodal NK/T-cell lymphoma of nasal type; ITCL-NOS, intestinal T cell lymphoma, not otherwise specified; PTCL-NOS, peripheral T cell lymphoma, not otherwise specified

d. EBV positivity was defined as when ≥30% of tumor cells showed positive signals upon in situ hybridisation for EBV-encoded RNAs (EBERs).
